# Supplementary material for: Liver Enzyme Elevations in Plasmodium falciparum Volunteer Infection Studies: Findings and Recommendations
Source: PubMed Central journal article supplement (PMC7356411; doi:10.4269/ajtmh.19-0846), 2020-04-20
Supplement: tpmd190846.SD1.pdf [file tpmd190846.SD1.pdf]

## Supplemental material

### Liver enzyme elevations in *Plasmodium falciparum* volunteer infection studies: findings and recommendations

Farouk M Chughlay, Samantha Akakpo, Anand Odedra, Katalin Csermak-Renner, Elhadj Djeriou, Cornelis Winnips, Didier Leboulleux, Aditya H. Gaur, G. Dennis Shanks, James McCarthy, Stephan Chalon

**Supplemental Table 1.** Values for the upper limit of normal for each study included in the analysis.

**Supplemental Figure 1.** Profile for Subject 5103 in Study QP15C01. A: Changes in laboratory parameters; B: Concomitant medication; C: Adverse events of any cause.

**Supplemental Figure 2.** Temporal relationship between miR122 and ALT levels in subjects with increased ALT levels in study QP15C01.

**Supplemental Table 2.** Acetaminophen administration to subjects with moderate (Grade 2) or severe (Grade 3 or 4) increases in ALT in IBSM studies.

**Supplemental Figure 3.** Temporal relationship between acetaminophen dosing and presence of adducts in study QP15C01.

Cipargamin was administered on Day 8 at a sub-therapeutic dose. Subjects 5101, 5103 and 5108 had moderate-to-severe increases in ALT.

**Supplemental Table 3.** Data from a study of pafuramidine in the *Anopheles*-bite sporozoite challenge model. A) Risk of increased aminotransferase levels in subjects with or without malaria treated with pafuramidine and/or acetaminophen. B) Severity of changes in liver system laboratory measures with pafuramidine or placebo. Adapted from Nyunt MM, et al. Am J Trop Med Hyg 80:528-535.

**Supplemental Table 1.** Values for the upper limit of normal for each study included in the analysis.

| Study   | Test compound               | Upper limit of normal males, U/L |       |           | Upper limit of normal females, U/L |                   |           |
|---------|-----------------------------|----------------------------------|-------|-----------|------------------------------------|-------------------|-----------|
|         |                             | ALT                              | AST   | Bilirubin | ALT                                | AST               | Bilirubin |
| QP13C05 | Piperaquine                 | 40                               | 40    | 20        | 30                                 | 35                | 20        |
| QP13C14 | Ferroquine                  | 40                               | 40    | 20        | 30                                 | 35                | 15        |
| QP14C02 | ACT-451840                  | 40                               | 40    | 20        | NA                                 | NA                | NA        |
| QP14C11 | MMV390048                   | 39.3*                            | 39.3* | 20        | NA                                 | NA                | NA        |
| QP14C12 | OZ439 +<br>DSM265           | 39.3*                            | 39.3* | 20        | 29.5*                              | 34.4 <sup>†</sup> | 15        |
| QP14C21 | Piperaquine                 | 40                               | 40    | 20        | 30                                 | 35                | 15        |
| QP15C01 | Cipargamin +<br>piperaquine | 40                               | 40    | 20        | NA                                 | NA                | NA        |
| QP15C05 | Piperaquine                 | 40                               | 40    | 20        | NA                                 | NA                | NA        |
| QP15C20 | SJ733                       | 40                               | 40    | 20        | NA                                 | NA                | NA        |
| QP16C04 | MMV390048                   | 40                               | 40    | 20        | NA                                 | NA                | NA        |

NA, not applicable as no females were recruited to this study. \*0.668 ukat/L for males, 0.501 ukat/L for females. <sup>†</sup>0.5845 ukat/L.

**Supplemental Figure 1.** Profile for Subject 5103 in Study QP15C01. A: Changes in laboratory parameters; B: Concomitant medication; C: Adverse events of any cause.

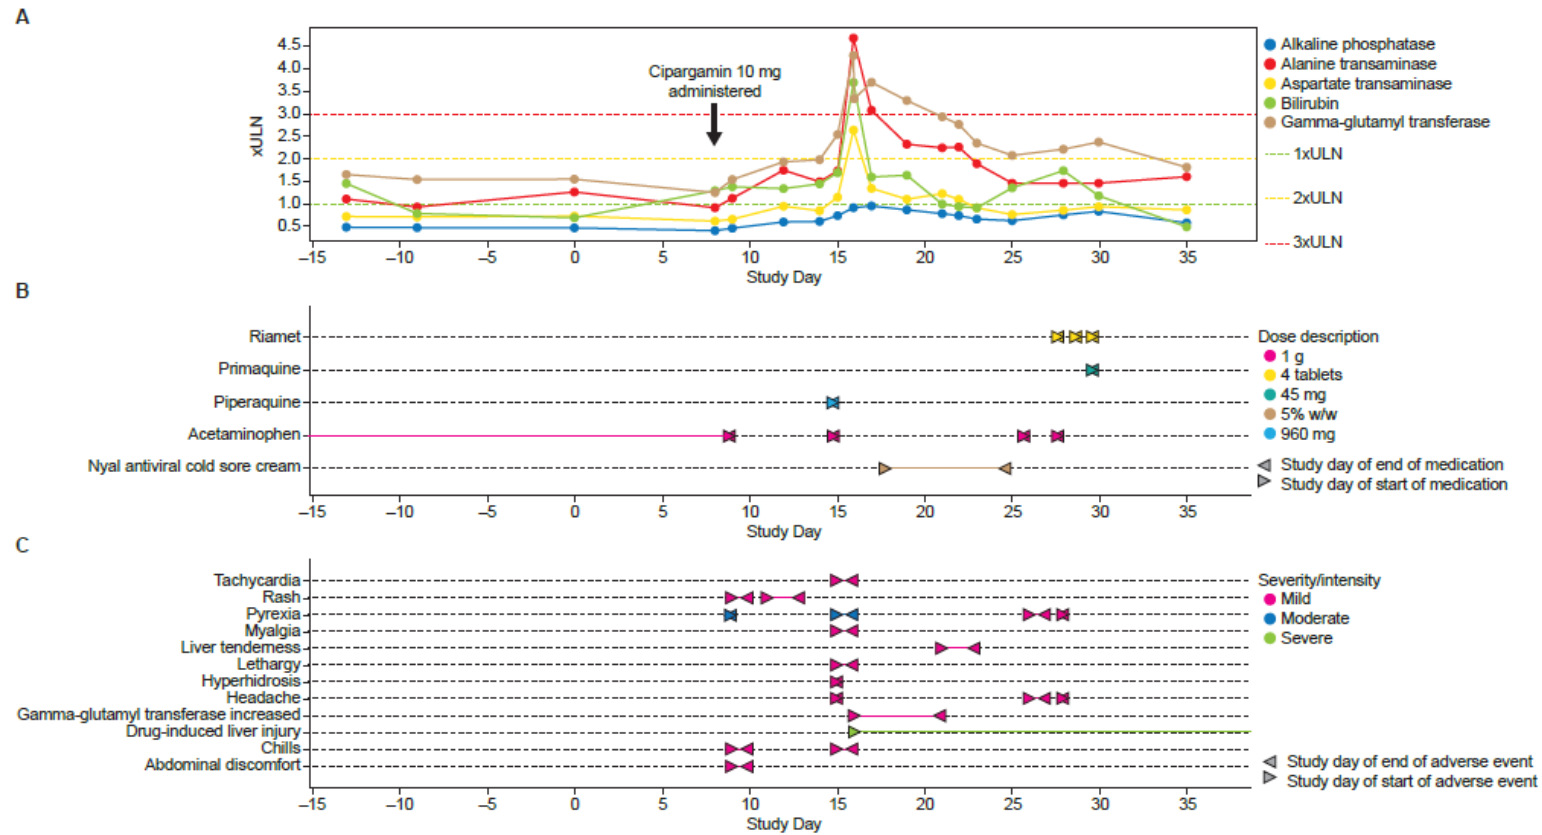

**Supplemental Figure 2.** Temporal relationship between miR122 and ALT levels in subjects with increased ALT levels in study QP15C01. Cipargamin was administered on Day 8 at a sub-therapeutic dose and piperavaquine on Day 11 in subject 5101, Day 15 in subject 5103 and Day 14 in subject 5108 at a therapeutic dose.

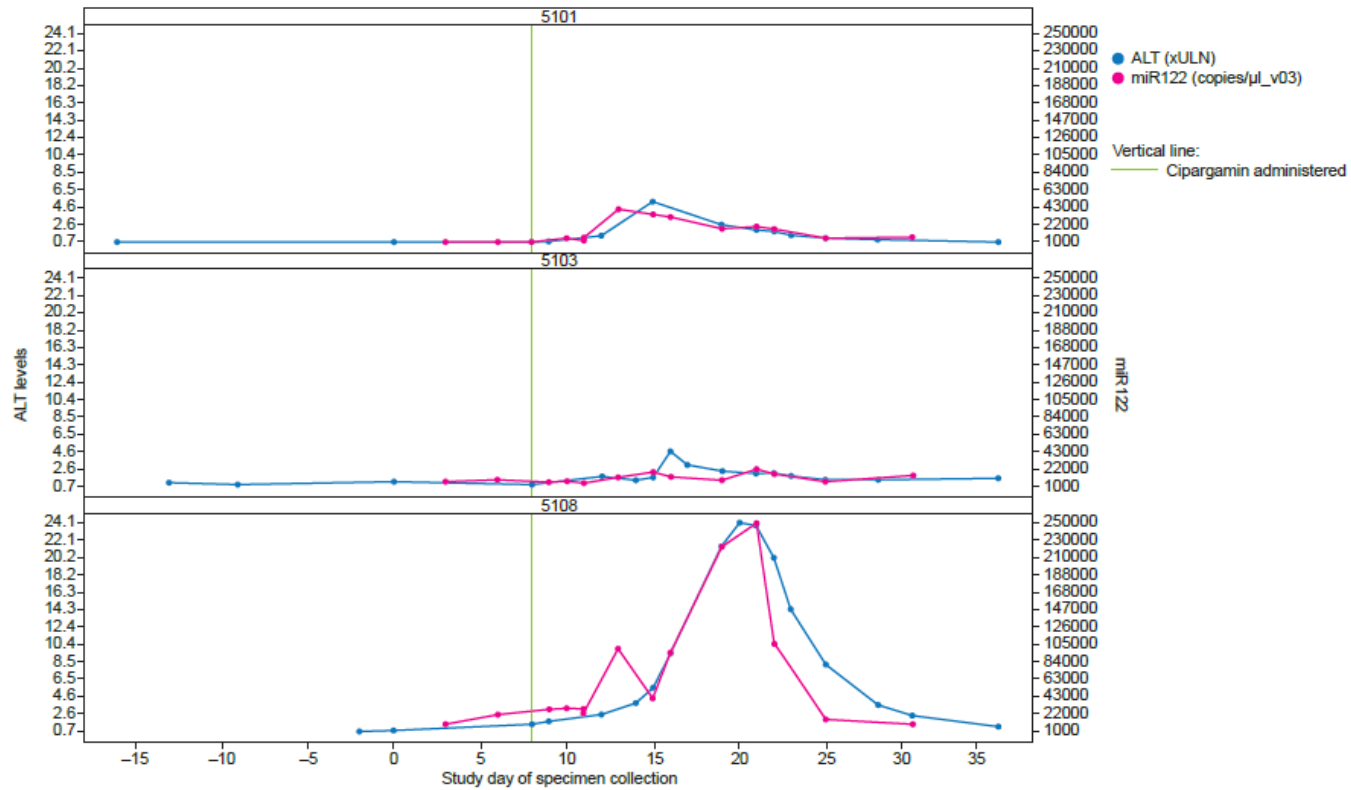

**Supplemental Table 2.** Acetaminophen administration to subjects with moderate (Grade 2) or severe (Grade 3 or 4) increases in ALT in IBSM studies.

| <b>Severity*</b>                | <b>Study: Subject</b> | <b>Cumulative acetaminophen dose (mg)</b> |
|---------------------------------|-----------------------|-------------------------------------------|
| Grade 2<br>2.5–5xULN (moderate) | QP13C05: R019         | 3000                                      |
|                                 | QP14C02: 007          | 4000                                      |
|                                 | QP14C12: R204         | 4000                                      |
|                                 | QP14C12: R103         | 0                                         |
|                                 | QP15C01: 5103         | 3000                                      |
|                                 | QP15C05: R109         | 0                                         |
|                                 | QP15C20: R107         | 1000                                      |
|                                 | QP15C20: R208         | 0                                         |
|                                 | QP16C04: R503         | 0                                         |
|                                 | QP16C04: R505         | 0                                         |
| Grade 3<br>5.1–10xULN (severe)  | QP14C12: R201         | 2000                                      |
|                                 | QP15C01: 5101         | 0                                         |
|                                 | QP15C05: R110         | 2000                                      |
|                                 | QP15C20: R102         | 0                                         |
| Grade 4<br>>10xULN (severe)     | QP13C14: R101(A)      | 0                                         |
|                                 | QP13C14: R104         | 6250                                      |
|                                 | QP13C14: R105         | 7000                                      |
|                                 | QP15C01: 5108         | 7000                                      |
|                                 | QP15C20: R101(G)      | 8500                                      |
|                                 | QP16C04: R502         | 0                                         |

\*Grades are based on the World Health Organization Adverse Event Grading System.

**Supplemental Figure 3.** Temporal relationship between acetaminophen dosing and presence of adducts in study QP15C01.

Cipargamin was administered on Day 8 at a sub-therapeutic dose. Subjects 5101, 5103 and 5108 had moderate-to-severe increases in ALT.

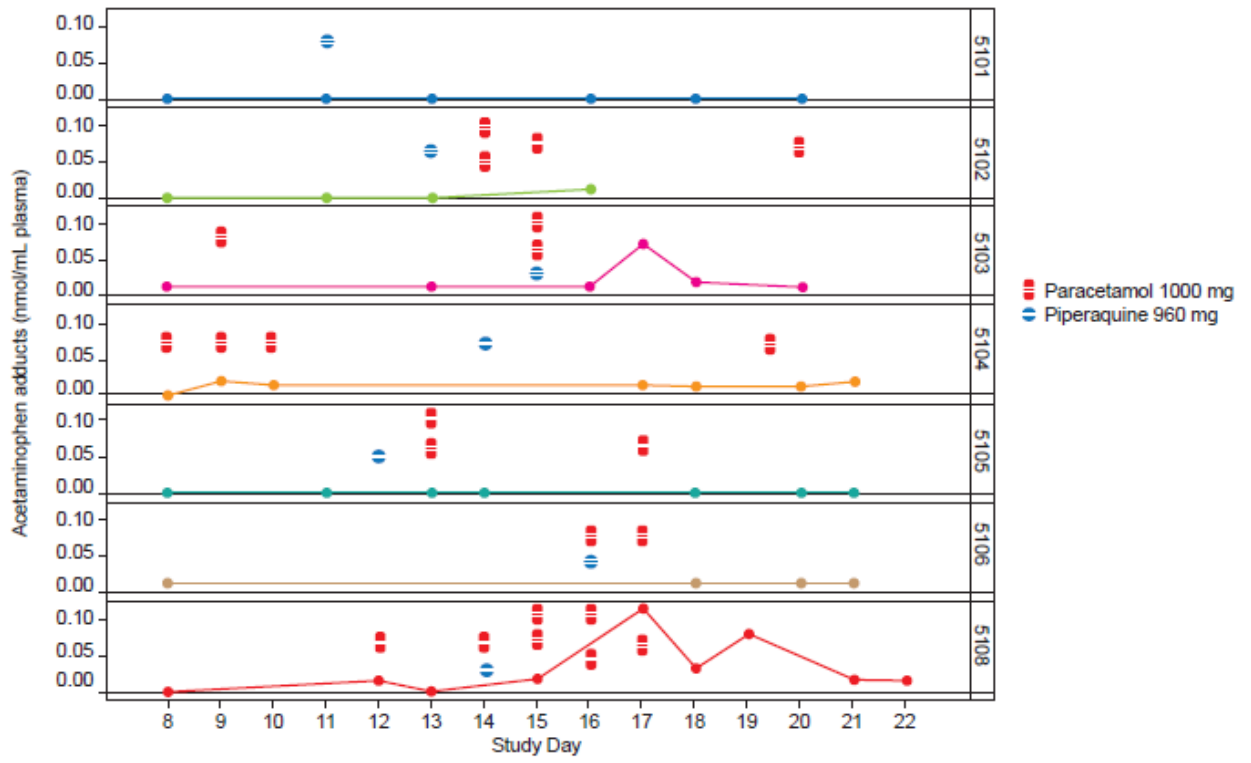

**Supplemental Table 3.** Data from a study of pafuramidine in the *Anopheles*-bite sporozoite challenge model. A) Risk of increased aminotransferase levels in subjects with or without malaria treated with pafuramidine and/or acetaminophen. B) Severity of changes in liver system laboratory measures with pafuramidine or placebo. Adapted from Nyunt MM, et al. Am J Trop Med Hyg 80:528-535.

A)

| <b>Risk factors</b>                       | <b>Increased ALT/AST (n=10)</b> | <b>No increase in ALT/AST (n=9)</b> | <b>Risk</b> |
|-------------------------------------------|---------------------------------|-------------------------------------|-------------|
| No malaria, acetaminophen or pafuramidine | 0                               | 1                                   | 0           |
| Pafuramidine alone                        | 0                               | 3                                   | 0           |
| Malaria + acetaminophen                   | 3                               | 1                                   | 0.75        |
| Malaria + pafuramidine                    | 1                               | 0                                   | 1.0         |
| Malaria + acetaminophen + pafuramidine    | 6                               | 4                                   | 0.6         |

B)

| <b>Increase in:</b> | <b>Severity*</b> | <b>Placebo (n=5)</b> | <b>Pafuramidine</b> |                     |
|---------------------|------------------|----------------------|---------------------|---------------------|
|                     |                  |                      | <b>Day -8 (n=7)</b> | <b>Day -1 (n=7)</b> |
| ALT/AST             | Grade 1          | 1                    | 1                   | 2                   |
|                     | Grade 2          | 1                    | 1                   | 0                   |
|                     | Grade 3          | 1                    | 1                   | 2                   |
|                     | Total            | 3                    | 3                   | 4                   |
| ALP                 | Grade 1          | 1                    | 1                   | 0                   |
| Total bilirubin     | Grade 1          | 1                    | 0                   | 2                   |

ALT, alanine aminotransferase; AST, aspartate aminotransferase; ALP, alkaline phosphatase. \*Grades are based on the World Health Organization Adverse Event Grading System.
